# Supplementary material for: Validation of Serum Neurofilament Light Chain as a Biomarker of Parkinson’s Disease Progression
Source: PubMed Central journal article supplement (PMC8017468; doi:10.1002/mds.28206), 2020-08-15

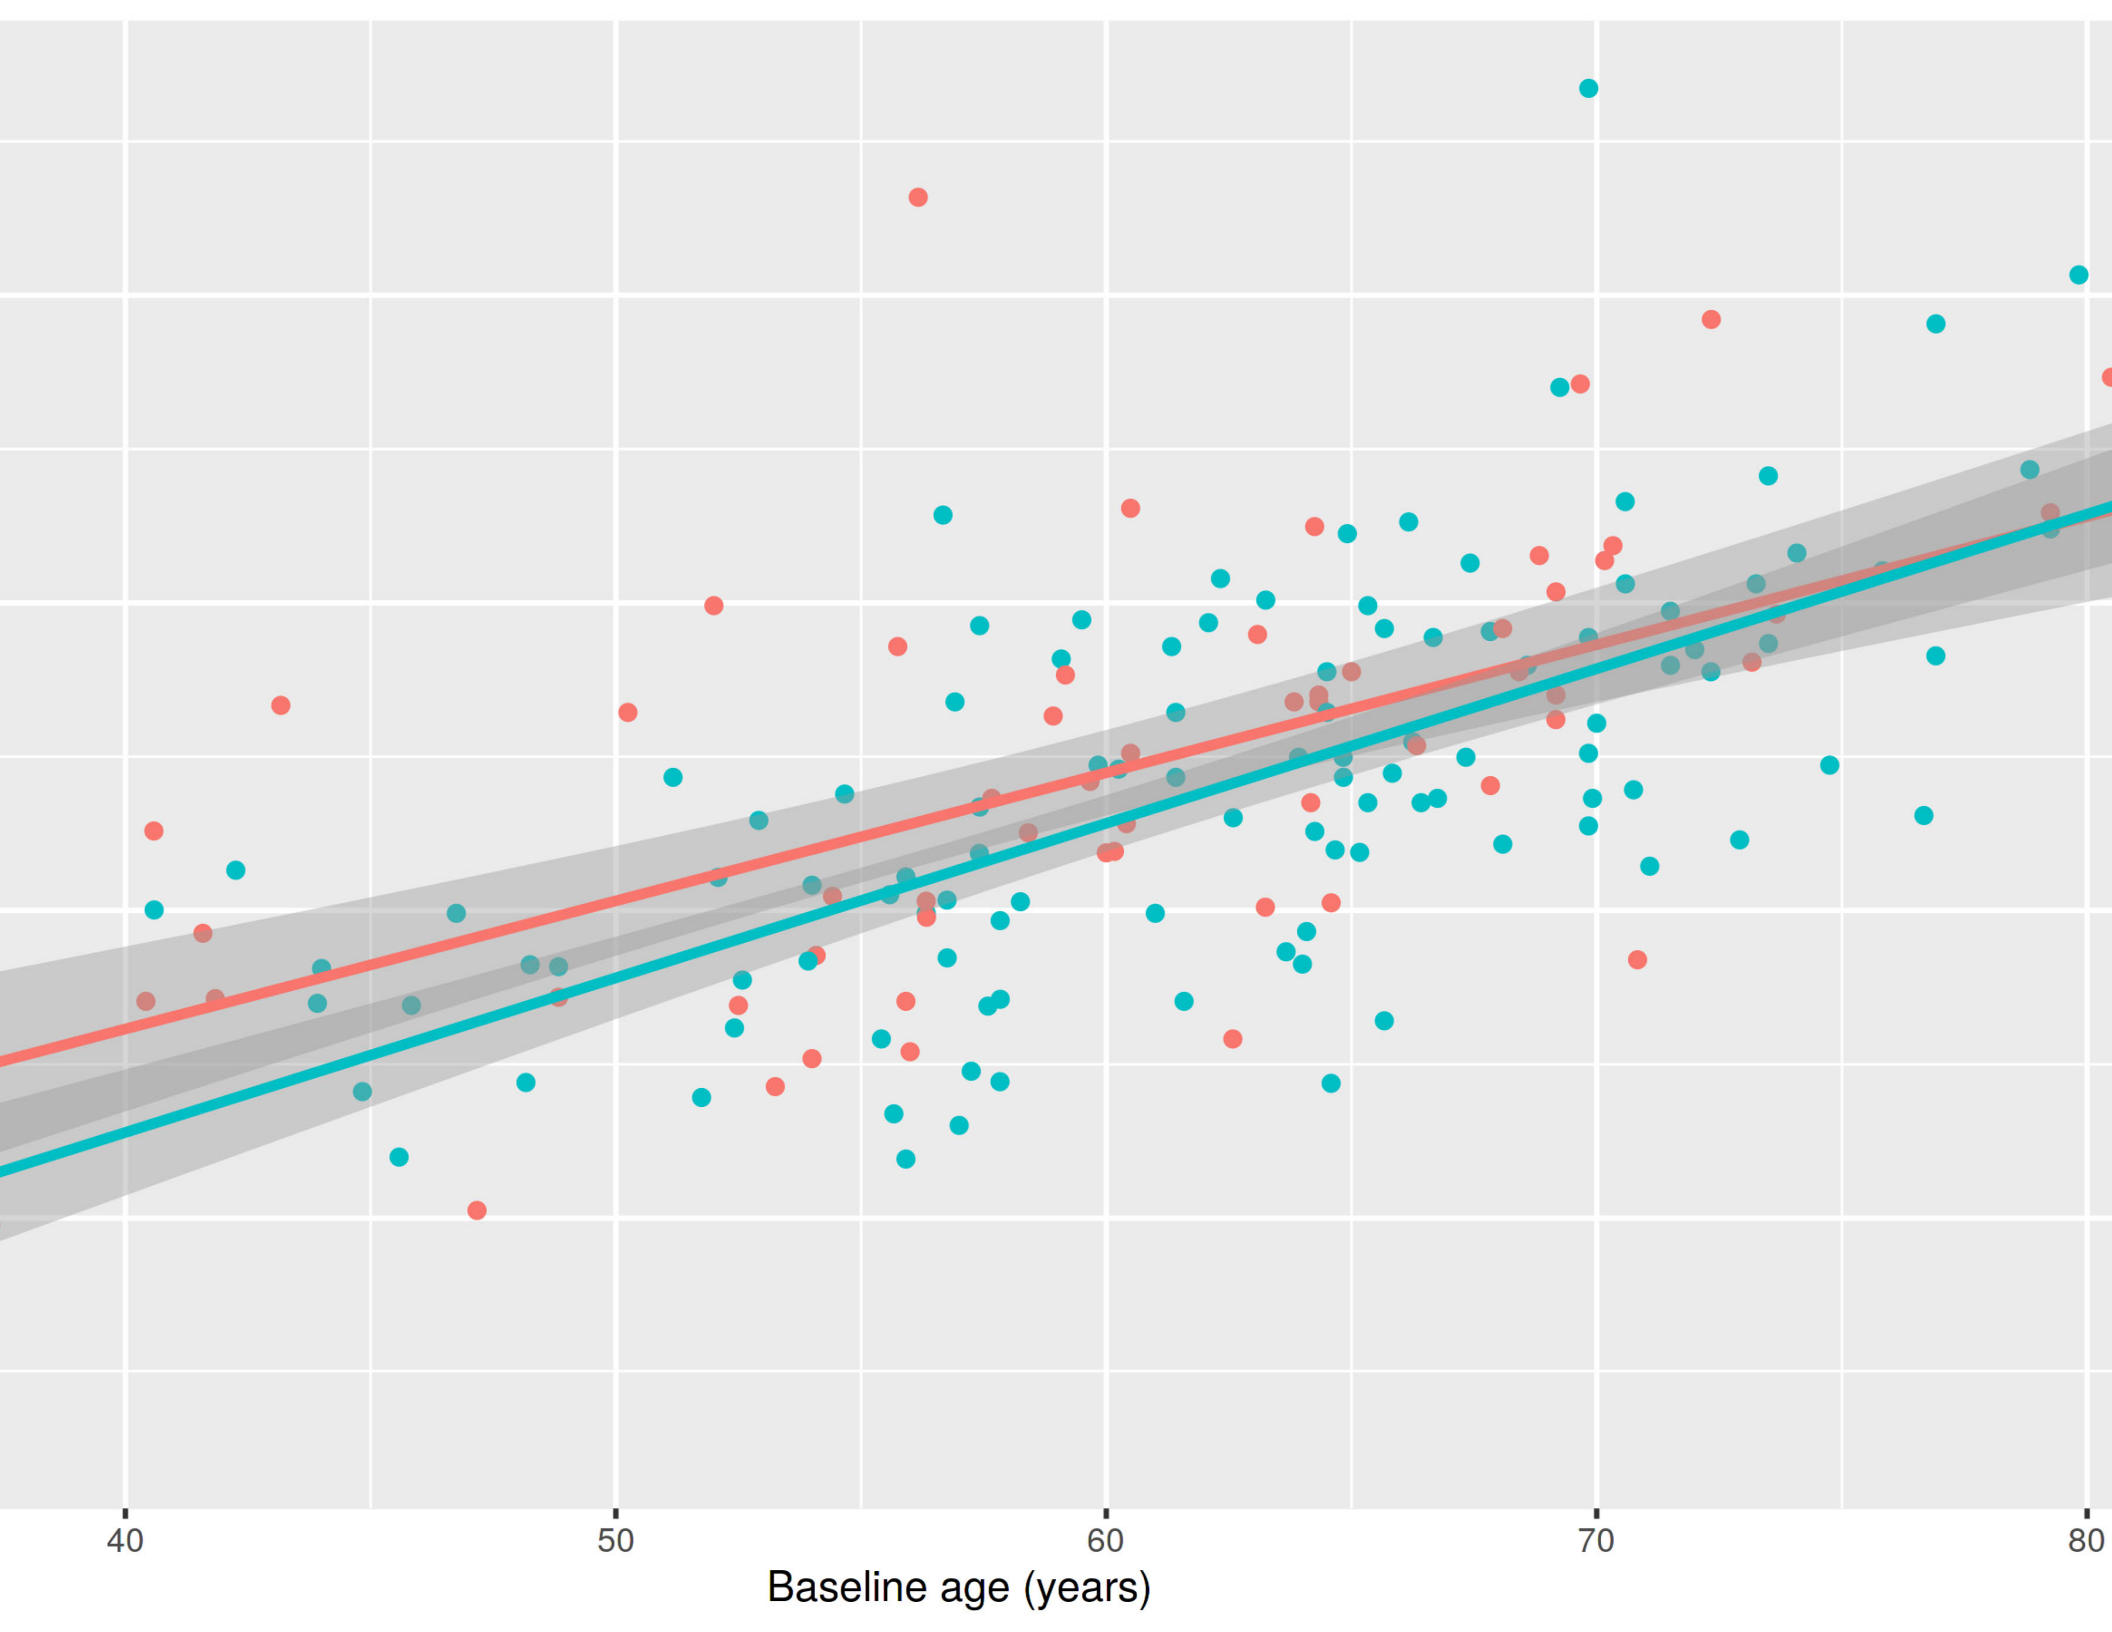

Supplement: NIHMS1682170-supplement-Photo.pdf [file NIHMS1682170-supplement-Photo.pdf]
